# Supplementary material for: Biodegradable Preformed Particle Gel (PPG) Made of Natural Chitosan Material for Water Shut-Off Application
Source: MDPI journal article supplement (doi:10.3390/polym15081961), 2023-04-20
Supplement: s1 [file s1]

# Supplementary Materials: Biodegradable Preformed Particle Gel (PPG) Made of Natural Chitosan Material for Water Shut-Off Application

Reem Elaf <sup>1</sup>, Ahmed Ben Ali <sup>1</sup>, Mohammed Saad <sup>1,2</sup>, Ibnelwaleed A. Hussein <sup>1,2,\*</sup>, Hassan Nimir <sup>3</sup> and Baojun Bai <sup>4</sup>

<sup>1</sup> Gas Processing Center, College of Engineering, Qatar University, Doha P.O. Box 2713, Qatar

<sup>2</sup> Department of Chemical Engineering, College of Engineering, Qatar University, Doha P.O. Box 2713, Qatar

<sup>3</sup> Department of Chemistry and Earth Sciences, College of Arts and Science, Qatar University, P.O. Box 2713, Doha, Qatar;

<sup>4</sup> Department of Geosciences and Geological and Petroleum Engineering, Missouri University of Science and Technology, Rolla, MO 65409, USA

\* Correspondence: ihussein@qu.edu.qa; Tel.: +974-4403-7694

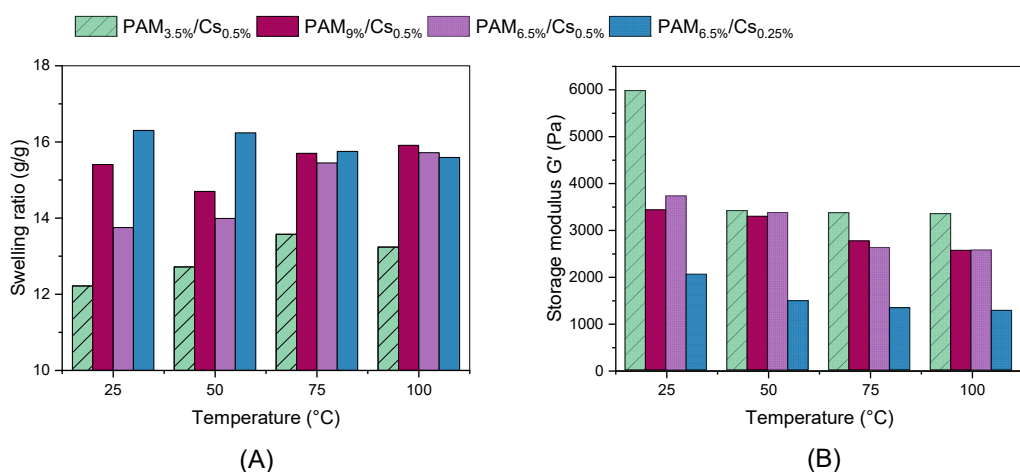

**Figure S1.** The (A) swelling ratio and (B) strength of PAM/Cs PPGs in the temperature range (25-100 °C) in HSW for 24 hours.

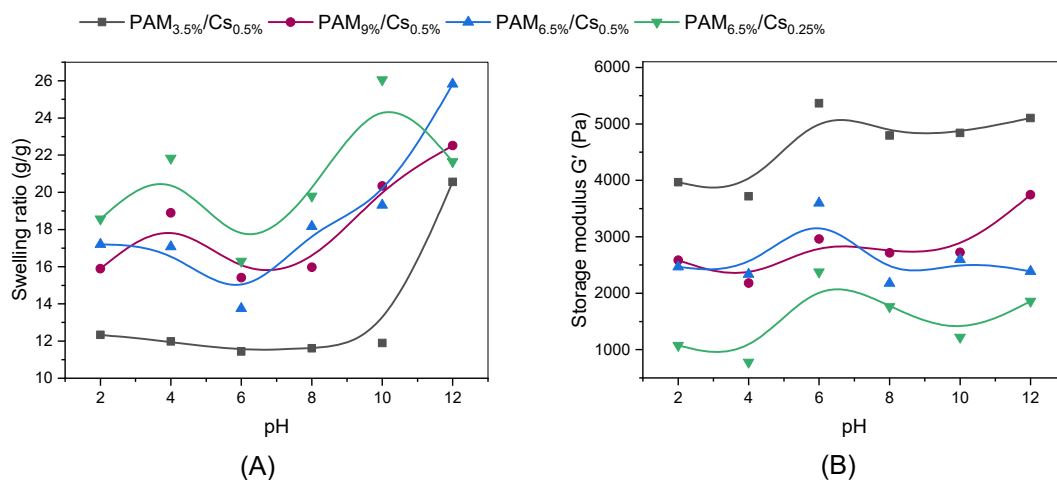

**Figure S2.** The effect of pH on the (A) swelling ratio and (B) strength of PAM/Cs PPGs in HSW for 24 hours.
